# Supplementary material for: Evolutionary Potential of a Duplicated Repressor-Operator Pair: Simulating Pathways Using Mutation Data
Source: PubMed Central journal article supplement (PMC1464816; doi:10.1371/journal.pcbi.0020058), 2006-05-26

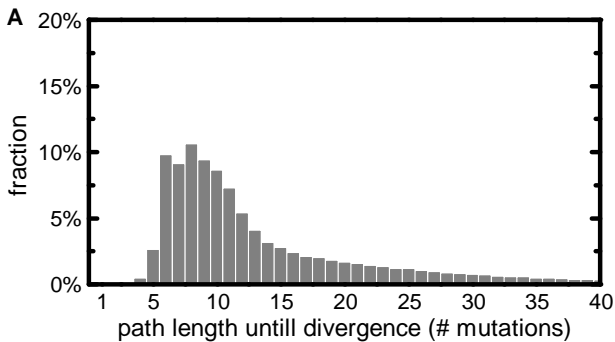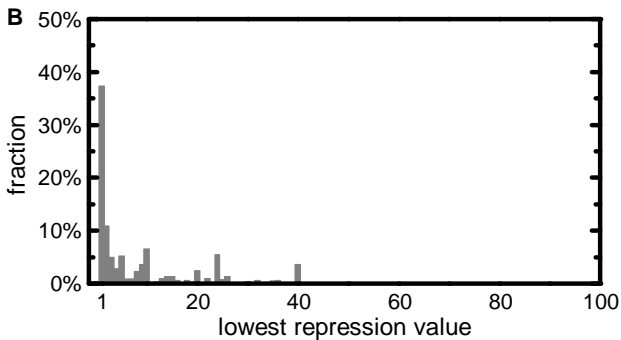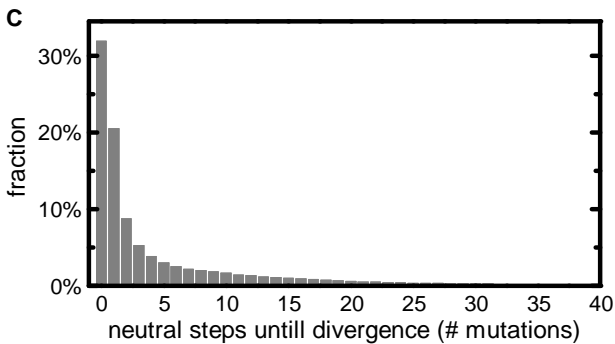

Supplement: pcbi.0020058.sg002.pdf [file pcbi.0020058.sg002.pdf]
